# Supplementary material for: Health Care Access and Affordability Among US Adults Aged 18 to 64 Years With Self-reported Post–COVID-19 Condition
Source: PubMed Central journal article supplement (PMC10087049; doi:10.1001/jamanetworkopen.2023.7455), 2023-04-10
Supplement: jamanetwopen-e237455-s001.pdf [file jamanetwopen-e237455-s001.pdf]

## Supplemental Online Content

Karpman M, Zuckerman S, Morriss S. Health care access and affordability among US adults aged 18 to 64 years with self-reported post–COVID-19 condition. *JAMA Netw Open*. 2023;6(4):e237455. doi:10.1001/jamanetworkopen.2023.7455

**eTable 1.** Demographic and Geographic Characteristics of Health Reform Monitoring Survey Respondents and Nonrespondents

**eTable 2.** Logistic Regression Models Estimating Association of Post–COVID-19 Condition With Unmet Needs for Health Care in Past 12 Months Because of Costs

**eTable 3.** Estimated Probabilities of Health Care Access Outcomes

**eTable 4.** Estimated Probabilities of Health Care Access Outcomes Using Bootstrapped Standard Errors

**eReferences.**

This supplemental material has been provided by the authors to give readers additional information about their work.

**eTable 1.** Demographic and Geographic Characteristics of Health Reform Monitoring Survey Respondents and Nonrespondents

| Characteristic                         | Respondents (%) <sup>a</sup> (N=9484) | Nonrespondents (%) <sup>a</sup> (N=9678) <sup>b</sup> | P value <sup>c</sup> |
|----------------------------------------|---------------------------------------|-------------------------------------------------------|----------------------|
| Sex                                    |                                       |                                                       |                      |
| Female                                 | 49.8                                  | 56.9                                                  | <.001                |
| Male                                   | 50.2                                  | 43.1                                                  | <.001                |
| Age, y                                 |                                       |                                                       |                      |
| 18-49                                  | 57.9                                  | 71.2                                                  | <.001                |
| 50-64                                  | 42.1                                  | 28.8                                                  | <.001                |
| Race and ethnicity                     |                                       |                                                       |                      |
| Asian                                  | 3.8                                   | 3.1                                                   | 0.01                 |
| Black                                  | 12.0                                  | 15.5                                                  | <.001                |
| Hispanic                               | 18.7                                  | 27.4                                                  | <.001                |
| White                                  | 60.6                                  | 49.2                                                  | <.001                |
| Other <sup>d</sup>                     | 5.0                                   | 4.8                                                   | 0.60                 |
| Educational attainment                 |                                       |                                                       |                      |
| High school degree or less             | 31.4                                  | 35.3                                                  | <.001                |
| Some college                           | 30.1                                  | 35.5                                                  | <.001                |
| Bachelor's degree or more              | 38.5                                  | 29.1                                                  | <.001                |
| Residence in a rural area <sup>e</sup> | 14.1                                  | 14.2                                                  | 0.78                 |

<sup>a</sup> Sample sizes and percentage estimates are unweighted. Percentage estimates are rounded.

<sup>b</sup> Nonrespondents include 9563 individuals who did not take the survey, 105 individuals who were excluded because of high levels of item nonresponse, and 10 individuals who were excluded from analysis because they did not answer questions on diagnosed COVID-19 or post-COVID-19 condition.

<sup>c</sup> P values were estimated using independent sample *t* tests of the differences between respondents and nonrespondents.

<sup>d</sup> Other race and ethnicity includes adults who did not identify as Hispanic and who identified as American Indian or Alaska Native, Native Hawaiian or other Pacific Islander, more than one race, or some other race.

<sup>e</sup> Adults who lived in a rural area include those who did not live in a metropolitan statistical area.

**eTable 2.** Logistic Regression Models Estimating Association of Post–COVID-19 Condition With Unmet Needs for Health Care in Past 12 Months Because of Costs

|                                                                                            | (1)                       |                   | (2)                       |                   | (3)                       |                   |        |       |   |
|--------------------------------------------------------------------------------------------|---------------------------|-------------------|---------------------------|-------------------|---------------------------|-------------------|--------|-------|---|
|                                                                                            | coefficient<br>(log odds) | standard<br>error | coefficient<br>(log odds) | standard<br>error | coefficient<br>(log odds) | standard<br>error |        |       |   |
| Reported current Long COVID (ref.)                                                         |                           |                   |                           |                   |                           |                   |        |       |   |
| Ever diagnosed with COVID-19 but without Long COVID                                        | -0.545                    | 0.084             | *                         | -0.544            | 0.085                     | *                 | -0.564 | 0.085 | * |
| Never diagnosed with COVID-19                                                              | -0.602                    | 0.075             | *                         | -0.608            | 0.079                     | *                 | -0.620 | 0.083 | * |
| Female sex                                                                                 | 0.340                     | 0.054             | *                         | 0.282             | 0.053                     | *                 | 0.275  | 0.057 | * |
| Male (ref.)                                                                                |                           |                   |                           |                   |                           |                   |        |       |   |
| Age 18-34                                                                                  | 0.361                     | 0.094             | *                         | 0.304             | 0.094                     | *                 | 0.293  | 0.094 | * |
| Age 35-49                                                                                  | 0.260                     | 0.068             | *                         | 0.278             | 0.067                     | *                 | 0.288  | 0.067 | * |
| Age 50-64 (ref.)                                                                           |                           |                   |                           |                   |                           |                   |        |       |   |
| Asian                                                                                      | -0.705                    | 0.305             | *                         | -0.696            | 0.290                     | *                 | -0.582 | 0.250 | * |
| Black                                                                                      | 0.027                     | 0.087             |                           | -0.070            | 0.083                     |                   | -0.107 | 0.082 |   |
| Hispanic                                                                                   | 0.191                     | 0.097             |                           | 0.073             | 0.103                     |                   | 0.122  | 0.112 |   |
| White (ref.)                                                                               |                           |                   |                           |                   |                           |                   |        |       |   |
| Other race or ethnicity <sup>a</sup>                                                       | 0.233                     | 0.142             |                           | 0.139             | 0.138                     |                   | 0.169  | 0.147 |   |
| High school degree or less                                                                 | 0.261                     | 0.088             | *                         | -0.019            | 0.093                     |                   | -0.024 | 0.089 |   |
| Some college                                                                               | 0.348                     | 0.091             | *                         | 0.136             | 0.091                     |                   | 0.128  | 0.094 |   |
| Bachelor's degree or more (ref.)                                                           |                           |                   |                           |                   |                           |                   |        |       |   |
| Citizen                                                                                    | 0.051                     | 0.146             |                           | 0.096             | 0.139                     |                   | 0.065  | 0.159 |   |
| Not a citizen (ref.)                                                                       |                           |                   |                           |                   |                           |                   |        |       |   |
| Married                                                                                    | -0.207                    | 0.056             | *                         | -0.069            | 0.067                     |                   | -0.062 | 0.063 |   |
| Not married (ref.)                                                                         |                           |                   |                           |                   |                           |                   |        |       |   |
| Lives with dependent children under 19                                                     | 0.256                     | 0.061             | *                         | 0.118             | 0.061                     |                   | 0.087  | 0.060 |   |
| Does not live with dependent children under 19 (ref.)                                      |                           |                   |                           |                   |                           |                   |        |       |   |
| Ever diagnosed with hypertension                                                           | 0.209                     | 0.092             | *                         | 0.184             | 0.089                     | *                 | 0.167  | 0.089 |   |
| Ever diagnosed with hyperlipidemia                                                         | 0.179                     | 0.114             |                           | 0.179             | 0.114                     |                   | 0.193  | 0.117 |   |
| Ever diagnosed with coronary heart disease, angina, heart attack, or other heart condition | 0.432                     | 0.160             | *                         | 0.401             | 0.158                     | *                 | 0.388  | 0.155 | * |
| Ever diagnosed with stroke                                                                 | 0.142                     | 0.195             |                           | 0.135             | 0.192                     |                   | 0.129  | 0.187 |   |
| Ever diagnosed with cancer                                                                 | 0.121                     | 0.163             |                           | 0.154             | 0.166                     |                   | 0.170  | 0.174 |   |
| Ever diagnosed with diabetes                                                               | 0.245                     | 0.080             | *                         | 0.207             | 0.077                     | *                 | 0.210  | 0.075 | * |
| Ever diagnosed with asthma                                                                 | 0.316                     | 0.086             | *                         | 0.318             | 0.084                     | *                 | 0.341  | 0.081 | * |
| Ever diagnosed with COPD, emphysema, or chronic bronchitis                                 | 0.270                     | 0.181             |                           | 0.236             | 0.172                     |                   | 0.185  | 0.168 |   |

|                                                                                   |        |       |   |        |       |   |        |       |   |
|-----------------------------------------------------------------------------------|--------|-------|---|--------|-------|---|--------|-------|---|
| Ever diagnosed with arthritis, gout, lupus, or fibromyalgia                       | 0.469  | 0.088 | * | 0.432  | 0.088 | * | 0.421  | 0.090 | * |
| Diagnosed with multiple physical health conditions                                | 0.083  | 0.153 |   | 0.075  | 0.150 |   | 0.053  | 0.147 |   |
| Not diagnosed with physical health conditions (ref.)                              |        |       |   |        |       |   |        |       |   |
| Insured all months of the year                                                    | -0.958 | 0.093 | * | -1.361 | 0.144 | * | -1.294 | 0.153 | * |
| Insured some months but not every month                                           | 0.135  | 0.117 |   | -0.204 | 0.136 |   | -0.146 | 0.142 |   |
| Uninsured all months of the year (ref.)                                           |        |       |   |        |       |   |        |       |   |
| Lives in urban area (ref.)                                                        |        |       |   |        |       |   |        |       |   |
| Lives in rural area <sup>b</sup>                                                  | 0.069  | 0.106 |   | -0.006 | 0.114 |   | -0.040 | 0.123 |   |
| Employer-sponsored health insurance at time of survey (ref.)                      |        |       |   |        |       |   |        |       |   |
| Public health insurance at time of survey                                         |        |       |   | -0.333 | 0.128 | * | -0.318 | 0.128 | * |
| Private nongroup or unspecified type of health insurance at time of survey        |        |       |   | 0.009  | 0.103 |   | -0.009 | 0.096 |   |
| Uninsured at time of survey                                                       |        |       |   | -0.672 | 0.165 | * | -0.675 | 0.164 | * |
| Family income less than or equal to 138% of federal poverty level (FPL)           |        |       |   | 1.100  | 0.112 | * | 1.100  | 0.111 | * |
| Family income greater than 138% to 249% FPL                                       |        |       |   | 0.993  | 0.104 | * | 0.992  | 0.103 | * |
| Family income greater than 250% to 399% FPL                                       |        |       |   | 0.800  | 0.099 | * | 0.781  | 0.100 | * |
| Family income greater than or equal to 400% FPL (ref.)                            |        |       |   |        |       |   |        |       |   |
| Lives in Northeast region (ref.)                                                  |        |       |   |        |       |   |        |       |   |
| Lives in Midwest region                                                           |        |       |   |        |       |   | 0.138  | 0.075 |   |
| Lives in South region                                                             |        |       |   |        |       |   | 0.209  | 0.095 | * |
| Lives in West region                                                              |        |       |   |        |       |   | -0.176 | 0.108 |   |
| Lowest quartile of population-to-primary care physician ratio (ref.) <sup>c</sup> |        |       |   |        |       |   |        |       |   |
| Second quartile of population-to-primary care physician ratio                     |        |       |   |        |       |   | 0.145  | 0.121 |   |
| Third quartile of population-to-primary care physician ratio                      |        |       |   |        |       |   | 0.082  | 0.084 |   |
| Highest quartile of population-to-primary care physician ratio                    |        |       |   |        |       |   | 0.078  | 0.121 |   |
| Constant                                                                          | -1.181 | 0.219 | * | -1.095 | 0.250 | * | -1.254 | 0.254 | * |
| Observations                                                                      | 9,484  |       |   | 9,484  |       |   | 9,422  |       |   |

\* P<0.05

<sup>a</sup> Other race and ethnicity includes adults who do not identify as Hispanic and who identify as American Indian or Alaska Native, Native Hawaiian or Other Pacific Islander, more than one race, or some other race.

<sup>b</sup> Adults who live in a rural area include those who do not live in a metropolitan statistical area.

<sup>c</sup> Population-to-primary care physician ratio is based on data from the County Health Rankings<sup>1</sup> and originally derived from 2019 American Medical Association Physician Masterfile data included in the 2020-2021 Area Health Resources File. Estimates exclude 62 observations with missing data.

**eTable 3.** Estimated Probabilities of Health Care Access Outcomes

|                                                                             | (1) Main model        |                | (2) With added controls for family income and health insurance coverage type |                | (3) With added controls for Census region and population-to-primary care physician ratio |                |
|-----------------------------------------------------------------------------|-----------------------|----------------|------------------------------------------------------------------------------|----------------|------------------------------------------------------------------------------------------|----------------|
|                                                                             | predicted probability | standard error | predicted probability                                                        | standard error | predicted probability                                                                    | standard error |
| <b>Has a usual place to get health care</b>                                 |                       |                |                                                                              |                |                                                                                          |                |
| Adults with current Long COVID                                              | 0.828                 | 0.016          | 0.828                                                                        | 0.016          | 0.825                                                                                    | 0.017          |
| Adults ever diagnosed with COVID-19 but without Long COVID                  | 0.835                 | 0.011          | 0.835                                                                        | 0.011          | 0.835                                                                                    | 0.011          |
| Adults never diagnosed with COVID-19                                        | 0.803                 | 0.010          | 0.803                                                                        | 0.010          | 0.803                                                                                    | 0.010          |
| <b>Did not get needed care in past 12 months for the following reasons:</b> |                       |                |                                                                              |                |                                                                                          |                |
| <b>Costs</b>                                                                |                       |                |                                                                              |                |                                                                                          |                |
| Adults with current Long COVID                                              | 0.270                 | 0.019          | 0.268                                                                        | 0.020          | 0.268                                                                                    | 0.021          |
| Adults ever diagnosed with COVID-19 but without Long COVID                  | 0.183                 | 0.012          | 0.184                                                                        | 0.012          | 0.182                                                                                    | 0.013          |
| Adults never diagnosed with COVID-19                                        | 0.175                 | 0.010          | 0.175                                                                        | 0.010          | 0.174                                                                                    | 0.010          |
| <b>Difficulty finding a provider accepting new patients</b>                 |                       |                |                                                                              |                |                                                                                          |                |
| Adults with current Long COVID                                              | 0.164                 | 0.010          | 0.164                                                                        | 0.010          | 0.164                                                                                    | 0.010          |
| Adults ever diagnosed with COVID-19 but without Long COVID                  | 0.101                 | 0.007          | 0.103                                                                        | 0.007          | 0.103                                                                                    | 0.007          |
| Adults never diagnosed with COVID-19                                        | 0.107                 | 0.006          | 0.106                                                                        | 0.005          | 0.106                                                                                    | 0.005          |
| <b>Difficulty getting an appointment as soon as needed</b>                  |                       |                |                                                                              |                |                                                                                          |                |
| Adults with current Long COVID                                              | 0.220                 | 0.014          | 0.220                                                                        | 0.014          | 0.222                                                                                    | 0.014          |
| Adults ever diagnosed with COVID-19 but without Long COVID                  | 0.144                 | 0.006          | 0.146                                                                        | 0.006          | 0.146                                                                                    | 0.006          |
| Adults never diagnosed with COVID-19                                        | 0.139                 | 0.005          | 0.138                                                                        | 0.005          | 0.137                                                                                    | 0.005          |
| <b>Difficulty getting to a doctor's office or clinic when it was open</b>   |                       |                |                                                                              |                |                                                                                          |                |
| Adults with current Long COVID                                              | 0.110                 | 0.011          | 0.110                                                                        | 0.011          | 0.110                                                                                    | 0.011          |
| Adults ever diagnosed with COVID-19 but without Long COVID                  | 0.053                 | 0.004          | 0.054                                                                        | 0.004          | 0.054                                                                                    | 0.004          |
| Adults never diagnosed with COVID-19                                        | 0.067                 | 0.002          | 0.067                                                                        | 0.002          | 0.067                                                                                    | 0.002          |

**Difficulty getting a telehealth visit**

|                                                            |       |       |       |       |       |       |
|------------------------------------------------------------|-------|-------|-------|-------|-------|-------|
| Adults with current Long COVID                             | 0.076 | 0.011 | 0.077 | 0.011 | 0.078 | 0.012 |
| Adults ever diagnosed with COVID-19 but without Long COVID | 0.031 | 0.003 | 0.032 | 0.003 | 0.032 | 0.003 |
| Adults never diagnosed with COVID-19                       | 0.040 | 0.003 | 0.040 | 0.003 | 0.040 | 0.003 |

**Difficulty finding transportation**

|                                                            |       |       |       |       |       |       |
|------------------------------------------------------------|-------|-------|-------|-------|-------|-------|
| Adults with current Long COVID                             | 0.061 | 0.009 | 0.063 | 0.009 | 0.064 | 0.010 |
| Adults ever diagnosed with COVID-19 but without Long COVID | 0.035 | 0.004 | 0.038 | 0.004 | 0.038 | 0.004 |
| Adults never diagnosed with COVID-19                       | 0.051 | 0.004 | 0.049 | 0.004 | 0.049 | 0.004 |

**Difficulty getting health plan authorization for care or prescription drugs**

|                                                            |       |       |       |       |       |       |
|------------------------------------------------------------|-------|-------|-------|-------|-------|-------|
| Adults with current Long COVID                             | 0.166 | 0.010 | 0.166 | 0.010 | 0.166 | 0.010 |
| Adults ever diagnosed with COVID-19 but without Long COVID | 0.108 | 0.006 | 0.110 | 0.006 | 0.109 | 0.006 |
| Adults never diagnosed with COVID-19                       | 0.103 | 0.005 | 0.102 | 0.005 | 0.102 | 0.005 |

**Difficulty finding a doctor accepting coverage type**

|                                                            |       |       |       |       |       |       |
|------------------------------------------------------------|-------|-------|-------|-------|-------|-------|
| Adults with current Long COVID                             | 0.159 | 0.012 | 0.159 | 0.012 | 0.159 | 0.012 |
| Adults ever diagnosed with COVID-19 but without Long COVID | 0.096 | 0.006 | 0.100 | 0.006 | 0.099 | 0.006 |
| Adults never diagnosed with COVID-19                       | 0.100 | 0.005 | 0.098 | 0.005 | 0.098 | 0.005 |

**Difficulty getting information on network, covered services, or cost of care**

|                                                            |       |       |       |       |       |       |
|------------------------------------------------------------|-------|-------|-------|-------|-------|-------|
| Adults with current Long COVID                             | 0.136 | 0.013 | 0.137 | 0.013 | 0.139 | 0.013 |
| Adults ever diagnosed with COVID-19 but without Long COVID | 0.076 | 0.005 | 0.077 | 0.005 | 0.075 | 0.005 |
| Adults never diagnosed with COVID-19                       | 0.086 | 0.006 | 0.085 | 0.006 | 0.085 | 0.007 |

**Additional health care affordability problems:****Problems paying family medical bills in past 12 months**

|                                                            |       |       |       |       |       |       |
|------------------------------------------------------------|-------|-------|-------|-------|-------|-------|
| Adults with current Long COVID                             | 0.235 | 0.021 | 0.233 | 0.021 | 0.234 | 0.021 |
| Adults ever diagnosed with COVID-19 but without Long COVID | 0.159 | 0.012 | 0.160 | 0.012 | 0.158 | 0.013 |
| Adults never diagnosed with COVID-19                       | 0.147 | 0.010 | 0.147 | 0.010 | 0.146 | 0.010 |

**Currently has medical bills that are past due**

|                                                            |       |       |       |       |       |       |
|------------------------------------------------------------|-------|-------|-------|-------|-------|-------|
| Adults with current Long COVID                             | 0.238 | 0.025 | 0.236 | 0.025 | 0.236 | 0.025 |
| Adults ever diagnosed with COVID-19 but without Long COVID | 0.157 | 0.016 | 0.159 | 0.016 | 0.158 | 0.017 |
| Adults never diagnosed with COVID-19                       | 0.140 | 0.012 | 0.140 | 0.012 | 0.139 | 0.012 |

**eTable 4.** Estimated Probabilities of Health Care Access Outcomes Using Bootstrapped Standard Errors

|                                                                             | (1) Main model        |                |                             |
|-----------------------------------------------------------------------------|-----------------------|----------------|-----------------------------|
|                                                                             | predicted probability | standard error | bootstrapped standard error |
| <b>Has a usual place to get health care</b>                                 |                       |                |                             |
| Adults with current Long COVID                                              | 0.828                 | 0.016          | 0.017                       |
| Adults ever diagnosed with COVID-19 but without Long COVID                  | 0.835                 | 0.011          | 0.011                       |
| Adults never diagnosed with COVID-19                                        | 0.803                 | 0.010          | 0.009                       |
| <b>Did not get needed care in past 12 months for the following reasons:</b> |                       |                |                             |
| <b>Costs</b>                                                                |                       |                |                             |
| Adults with current Long COVID                                              | 0.270                 | 0.019          | 0.017                       |
| Adults ever diagnosed with COVID-19 but without Long COVID                  | 0.183                 | 0.012          | 0.012                       |
| Adults never diagnosed with COVID-19                                        | 0.175                 | 0.010          | 0.010                       |
| <b>Difficulty finding a provider accepting new patients</b>                 |                       |                |                             |
| Adults with current Long COVID                                              | 0.164                 | 0.010          | 0.009                       |
| Adults ever diagnosed with COVID-19 but without Long COVID                  | 0.101                 | 0.007          | 0.007                       |
| Adults never diagnosed with COVID-19                                        | 0.107                 | 0.006          | 0.005                       |
| <b>Difficulty getting an appointment as soon as needed</b>                  |                       |                |                             |
| Adults with current Long COVID                                              | 0.220                 | 0.014          | 0.014                       |
| Adults ever diagnosed with COVID-19 but without Long COVID                  | 0.144                 | 0.006          | 0.007                       |
| Adults never diagnosed with COVID-19                                        | 0.139                 | 0.005          | 0.005                       |
| <b>Difficulty getting to a doctor's office or clinic when it was open</b>   |                       |                |                             |
| Adults with current Long COVID                                              | 0.110                 | 0.011          | 0.011                       |
| Adults ever diagnosed with COVID-19 but without Long COVID                  | 0.053                 | 0.004          | 0.005                       |
| Adults never diagnosed with COVID-19                                        | 0.067                 | 0.002          | 0.003                       |
| <b>Difficulty getting a telehealth visit</b>                                |                       |                |                             |
| Adults with current Long COVID                                              | 0.076                 | 0.011          | 0.010                       |
| Adults ever diagnosed with COVID-19 but without Long COVID                  | 0.031                 | 0.003          | 0.003                       |



|                                                                                            |       |       |       |
|--------------------------------------------------------------------------------------------|-------|-------|-------|
| Adults never diagnosed with COVID-19                                                       | 0.040 | 0.003 | 0.003 |
| <b><i>Difficulty finding transportation</i></b>                                            |       |       |       |
| Adults with current Long COVID                                                             | 0.061 | 0.009 | 0.009 |
| Adults ever diagnosed with COVID-19 but without Long COVID                                 | 0.035 | 0.004 | 0.004 |
| Adults never diagnosed with COVID-19                                                       | 0.051 | 0.004 | 0.003 |
| <b><i>Difficulty getting health plan authorization for care or prescription drugs</i></b>  |       |       |       |
| Adults with current Long COVID                                                             | 0.166 | 0.010 | 0.011 |
| Adults ever diagnosed with COVID-19 but without Long COVID                                 | 0.108 | 0.006 | 0.006 |
| Adults never diagnosed with COVID-19                                                       | 0.103 | 0.005 | 0.004 |
| <b><i>Difficulty finding a doctor accepting coverage type</i></b>                          |       |       |       |
| Adults with current Long COVID                                                             | 0.159 | 0.012 | 0.013 |
| Adults ever diagnosed with COVID-19 but without Long COVID                                 | 0.096 | 0.006 | 0.006 |
| Adults never diagnosed with COVID-19                                                       | 0.100 | 0.005 | 0.005 |
| <b><i>Difficulty getting information on network, covered services, or cost of care</i></b> |       |       |       |
| Adults with current Long COVID                                                             | 0.136 | 0.013 | 0.013 |
| Adults ever diagnosed with COVID-19 but without Long COVID                                 | 0.076 | 0.005 | 0.005 |
| Adults never diagnosed with COVID-19                                                       | 0.086 | 0.006 | 0.006 |
| <b>Additional health care affordability problems:</b>                                      |       |       |       |
| <b><i>Problems paying family medical bills in past 12 months</i></b>                       |       |       |       |
| Adults with current Long COVID                                                             | 0.235 | 0.021 | 0.021 |
| Adults ever diagnosed with COVID-19 but without Long COVID                                 | 0.159 | 0.012 | 0.012 |
| Adults never diagnosed with COVID-19                                                       | 0.147 | 0.010 | 0.009 |
| <b><i>Currently has medical bills that are past due</i></b>                                |       |       |       |
| Adults with current Long COVID                                                             | 0.238 | 0.025 | 0.022 |
| Adults ever diagnosed with COVID-19 but without Long COVID                                 | 0.157 | 0.016 | 0.016 |
| Adults never diagnosed with COVID-19                                                       | 0.140 | 0.012 | 0.011 |

---

Bootstrapped standard errors are based on the standard deviation of estimated predicted probabilities across 100 replications using bootstrap resampling weights.

## eReferences

<sup>1</sup> County Health Rankings & Roadmaps 2022. University of Wisconsin Population Health Institute. Accessed February 22, 2023. <https://www.countyhealthrankings.org>.
