# Supplementary material for: Health Care Access and Affordability Among US Adults Aged 18 to 64 Years With Self-reported Post–COVID-19 Condition
Source: PubMed Central journal article supplement (PMC10087049; doi:10.1001/jamanetworkopen.2023.7455), 2023-04-10
Supplement: jamanetwopen-e237455-s002.pdf [file jamanetwopen-e237455-s002.pdf]

## Data Sharing Statement

Karpman. Health Care Access and Affordability Among US Adults Aged 18 to 64 Years With Self-reported Post–COVID-19 Condition. *JAMA Network Open*. Published online April 10, 2023. doi:10.1001/jamanetworkopen.2023.7455

### Data

**Data available:** Yes

**Data types:** Deidentified participant data

**How to access data:** The public use data file for the 2022 Health Reform Monitoring Survey will be made available through the Health and Medical Care Archive of the Inter-university Consortium for Political and Social Research (ICPSR):

<https://www.icpsr.umich.edu/web/pages/HMCA/index.html> . Public use files are deposited with ICPSR nine months after the survey is fielded.

**When available:** beginning date: 04-05-2023

### Supporting Documents

**Document types:** Other (please specify)

**Additional Information:** Codebook

**How to access documents:** The codebook will be made available through the Health and Medical Care Archive of the Inter-university Consortium for Political and Social Research (ICPSR): <https://www.icpsr.umich.edu/web/pages/HMCA/index.html> .

**When available:** beginning date: 04-05-2023

### Additional Information

**Who can access the data:** The public use file will be made available to anyone requesting the data.

**Types of analyses:** The data will be available for any types of analyses.

**Mechanisms of data availability:** The data will be made available without investigator support.
